# Supplementary material for: Respiratory viral infections in otherwise healthy humans with inherited IRF7 deficiency
Source: PubMed Central journal article supplement (PMC9178406; doi:10.1084/jem.20220202), 2022-06-07
Supplement: JEM_20220202_SourceDataF3.pdf [file JEM_20220202_SourceDataF3.pdf]

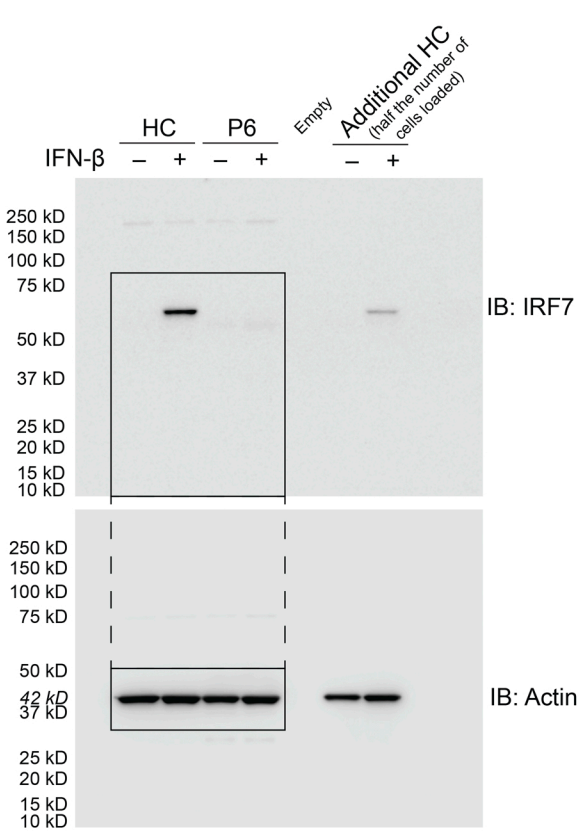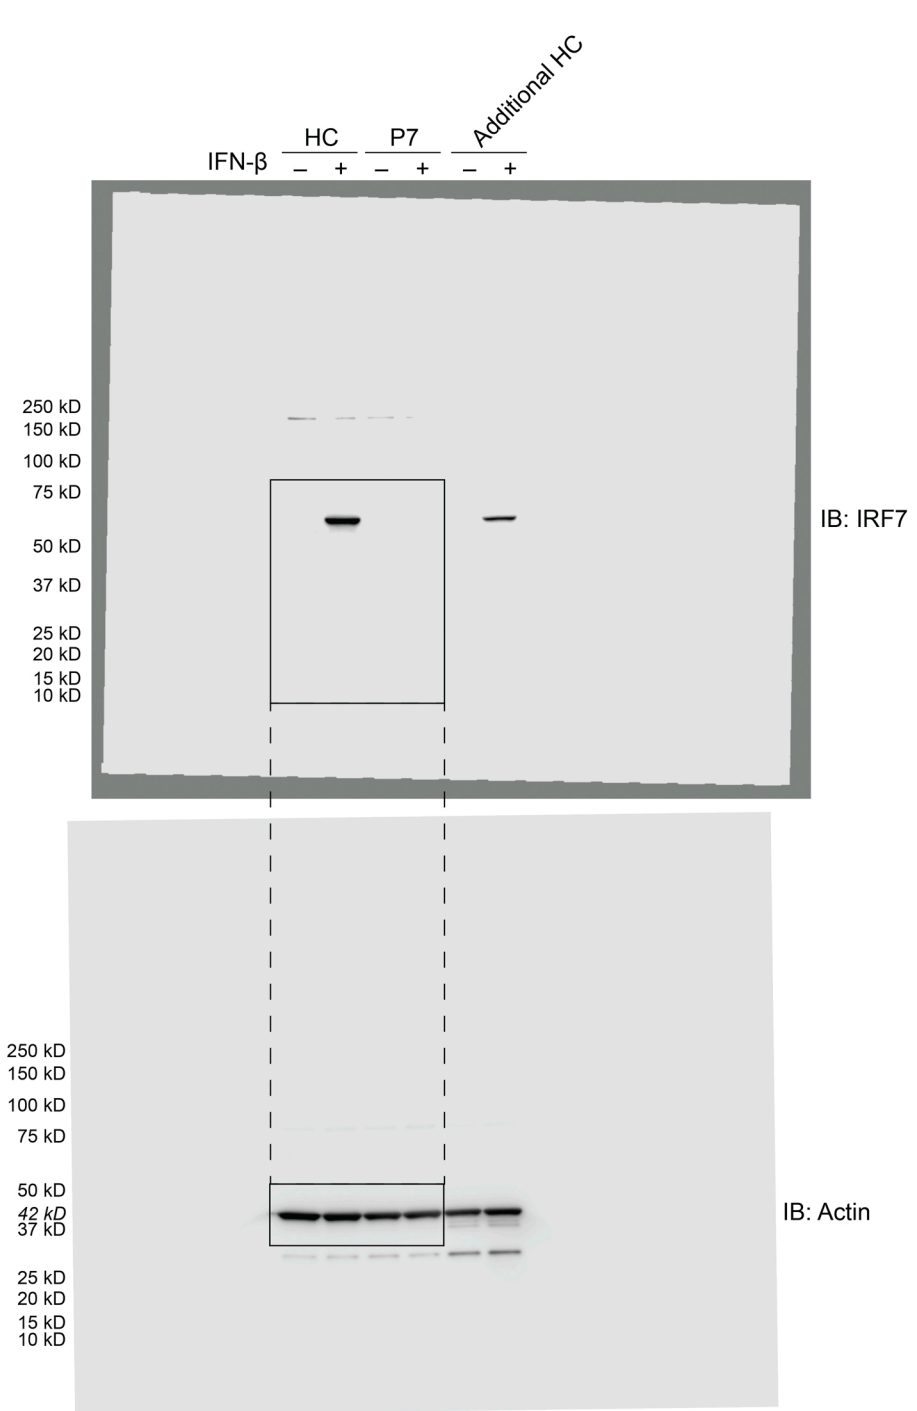

Source Data F3. Campbell, Liu, Zhang *et al.*
